# Supplementary material for: BSA-directed synthesis of CuS nanoparticles as a biocompatible photothermal agent for tumor ablation in vivo
Source: Royal Society of Chemistry journal article supplement (doi:10.1039/c5dt01467k), 2015-01-01
Supplement: c5dt01467k1.pdf [file c5dt01467k1.pdf]

# **Electronic Supplementary Information for**

## **BSA-directed Synthesis of CuS Nanoparticles as a Biocompatible Photothermal Agent for Tumor Ablation in Vivo**

Cai Zhang,<sup>b</sup> Yanyan Fu,<sup>a</sup> Xuejun Zhang,<sup>a</sup> Chunshui Yu,<sup>ab</sup> Yan Zhao,<sup>c</sup> and Shao-Kai Sun<sup>\*,a</sup>

<sup>a</sup> School of Medical Imaging, Tianjin Medical University, Tianjin 300203, China

<sup>b</sup> Department of Radiology, Tianjin Key Laboratory of Functional Imaging, Tianjin Medical University General Hospital, Tianjin 300052, China.

<sup>c</sup> Tianjin Institute of infectious diseases, the Second Hospital of Tianjin Medical University, Tianjin 300211, China

\*Corresponding author. E-mail: shaokaisun@163.com

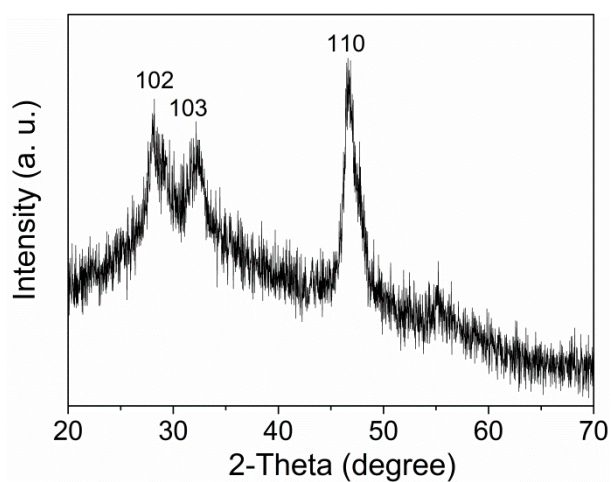

**Figure S1.** XRD patterns of BSA-CuS nanoparticles. BSA-CuS nanoparticles were treated by trypsin to reduce interference of high contents of BSA before the XRD characterization. Experiment condition: 1 mg/mL trypsin, 5 mM  $\text{CaCl}_2$ , 10 mM Tris-HCl buffer (pH 8.0).

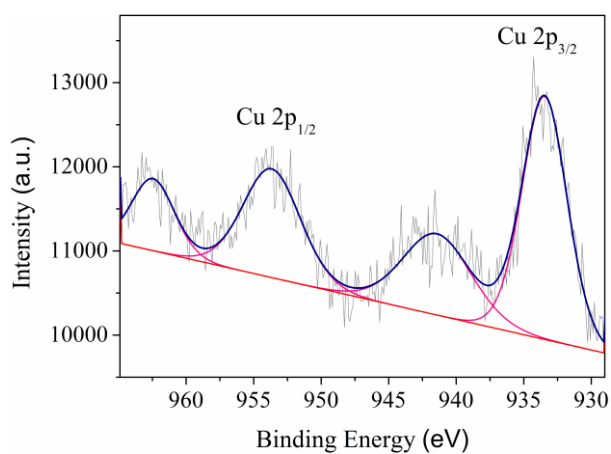

**Figure S2.** XPS spectra of Cu in the prepared BSA-CuS nanoparticles.

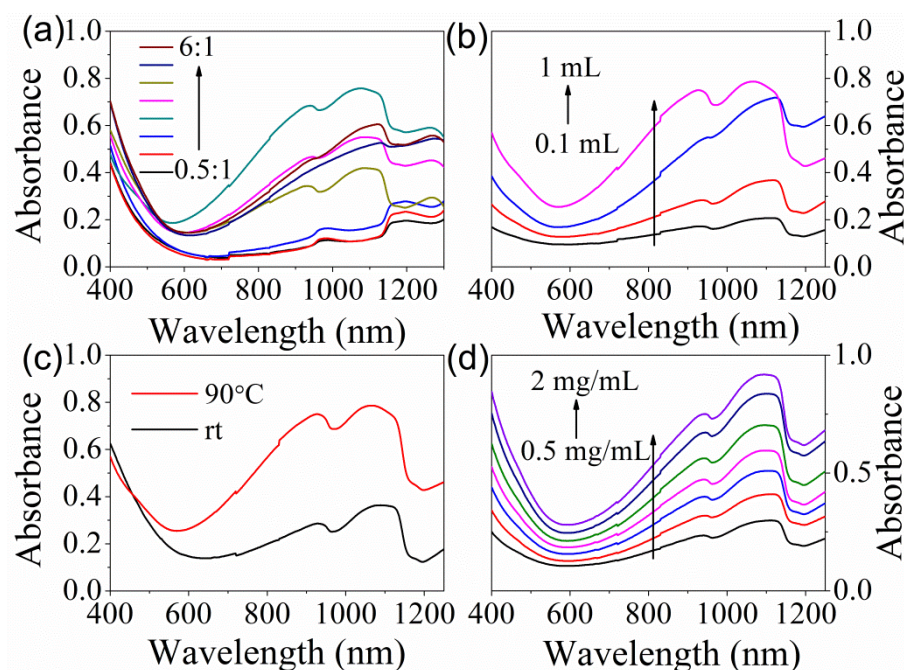

**Figure S3.** (a) UV-vis-NIR absorption spectra of the BSA-CuS nanoparticles prepared with various ratios of S to Cu (0.5, 0.75, 1, 2, 3, 4, 5, 6). (b) UV-vis-NIR absorption spectra of the BSA-CuS nanoparticles with different dosages of  $\text{Cu}(\text{NO}_3)_2$  solution (0.1, 0.25, 0.5, 1 mL). (c) UV-Vis-NIR absorption spectra of the BSA-CuS nanoparticles obtained at 90 °C and room temperature. (d) UV-vis-NIR absorption spectra of the BSA-CuS nanoparticles prepared under optimal conditions with different concentrations (0.5, 0.75, 1, 1.25, 1.5, 1.75, 2 mg/mL)

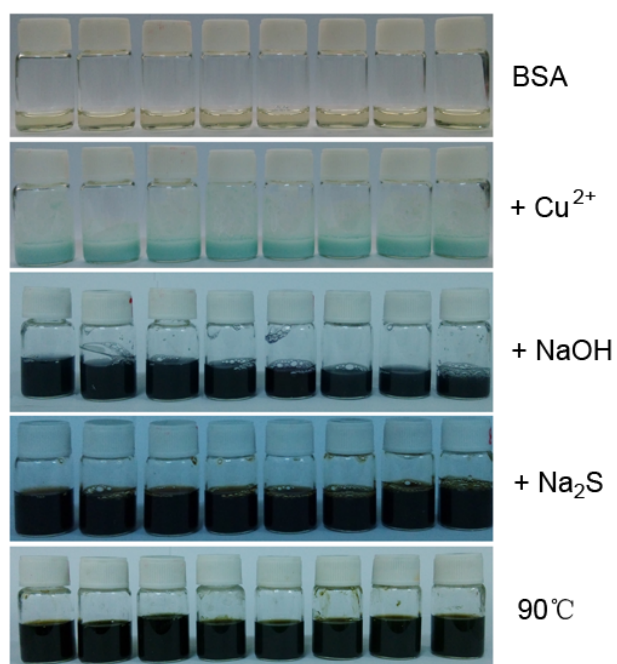

**Figure S4.** Different stages of optimizing the ratio of Cu to S with the concentration of BSA fixed.

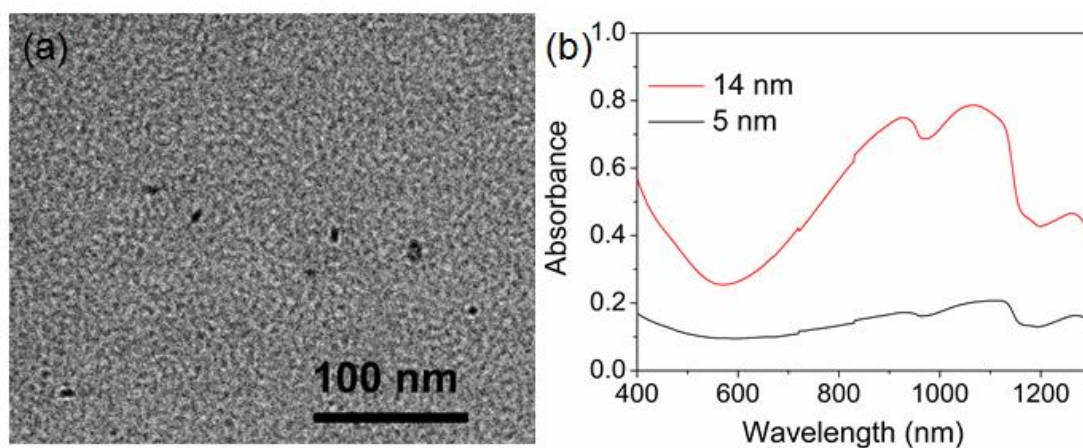

**Figure S5.** (a) HRTEM of 5 nm BSA-CuS nanoparticles. (b) Absorption spectra of different sizes of BSA-CuS nanoparticles. 5 nm and 14 nm BSA-CuS nanoparticles were obtained using 0.1 mL and 1 mL  $\text{Cu}(\text{NO}_3)_3$  as the precursor, respectively.

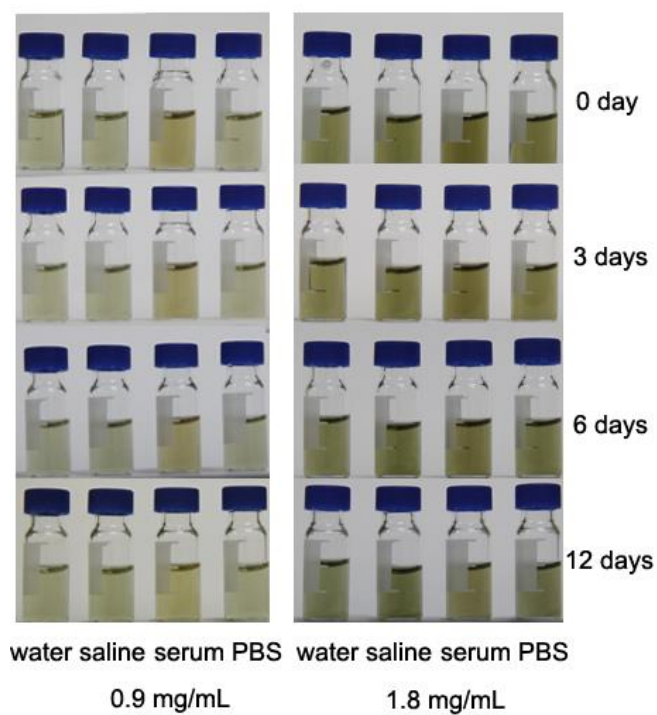

**Figure S6.** Colloidal stability of different concentrations of BSA-CuS nanoparticles (0.9 mg/mL and 1.8 mg/mL) after incubating with pure water, PBS, normal saline, serum (from left to right) for 12 days.

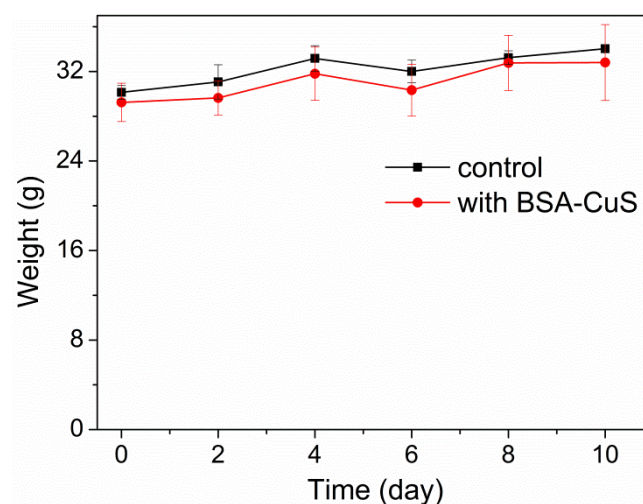

**Figure S7.** The weight changes of the mice treated with BSA-CuS nanoparticles and without any treatment.

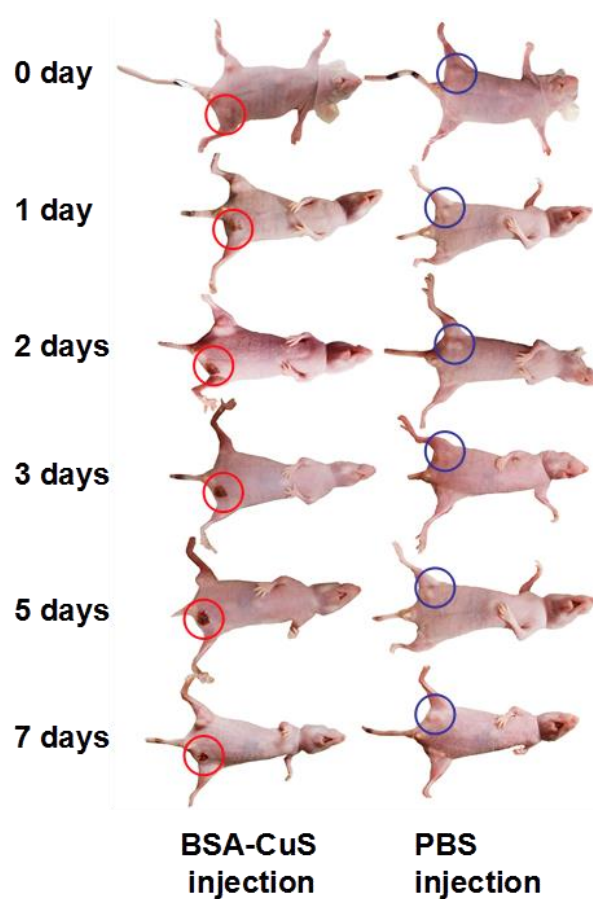

**Figure S8.** Representative photos of mice at different time points post-injection of PBS or BSA-CuS nanoparticles with the laser irradiation. The tumors without any treatment were regarded as intraindividual control groups.
